# Supplementary material for: Approaches to Nutritional Screening in Patients with Coronavirus Disease 2019 (COVID-19)
Source: Int J Environ Res Public Health. 2021 Mar 9;18(5):2772. doi: 10.3390/ijerph18052772 (PMC7967488; doi:10.3390/ijerph18052772)
Supplement: Supplementary file 1 [file ijerph-18-02772-s001.xlsx]

## Sheet: PubMedSearchHistory
Search number	Query	Sort By	Filters	Search Details	Results	Time
1	(((((SARS-CoV-2[Title/Abstract]) OR (Coronavirus disease 2019[Title/Abstract] OR COVID-19[Title/Abstract])) AND (malnutrition[Title/Abstract])) OR (nutrition risk[Title/Abstract])) OR (nutritional deficiency[Title/Abstract])) OR (hypoproteinemia[Title/Abstract])	Most Recent	Abstract, Adult: 19-44 years, Aged: 65+ years, 80 and over: 80+ years, Middle Aged: 45-64 years, from 2019 - 2021	((("SARS-CoV-2"[Title/Abstract] OR ("coronavirus disease 2019"[Title/Abstract] OR "COVID-19"[Title/Abstract])) AND "malnutrition"[Title/Abstract]) OR "nutrition risk"[Title/Abstract] OR "nutritional deficiency"[Title/Abstract] OR "hypoproteinemia"[Title/Abstract]) AND ((fha[Filter]) AND (adult[Filter] OR aged[Filter] OR 80andover[Filter] OR middleaged[Filter]) AND (2019:2021[pdat]))	188	21:03:16

## Sheet: PubMed search results
1	Abd Aziz, N.A.S.; Mohd Fahmi Teng, N.I.; Kamarul Zaman, M. Geriatric Nutrition Risk Index is comparable to the mini nutritional assessment for assessing nutritional status in elderly hospitalized patients. Clin Nutr ESPEN 2019, 29, 77-85, doi:10.1016/j.clnesp.2018.12.002.
2	Ahuja, D.; Choudhary, N.; Kumar, V.; Gupta, N.; Jee Bharati, S. Managing breakthrough pain for advanced malignancy in elderly patients: A real challenge. J Opioid Manag 2020, 16, 219-222, doi:10.5055/jom.2020.0571.
3	Akakpo, A.S.; Saka, B.; Teclessou, J.N.; Mouhari-Toure, A.; Moise Elegbede, Y.; Kombate, K.; Tchangai-Walla, K.; Pitche, P. Pellagra and pellagra-like erythema in a hospital setting in Lomé, Togo : retrospective study from 1997 to 2017. Med Sante Trop 2019, 29, 68-70, doi:10.1684/mst.2018.0856.
4	Al-Kalaldeh, M.; Suleiman, K.; Al-Kalaldeh, O. Prognostic Performance of NUTRIC Score in Quantifying Malnutrition Risk in the Critically Ill in Congruence With the Bioelectrical Impedance Analysis. Nutr Clin Pract 2020, 35, 559-566, doi:10.1002/ncp.10440.
5	Allard, L.; Ouedraogo, E.; Molleville, J.; Bihan, H.; Giroux-Leprieur, B.; Sutton, A.; Baudry, C.; Josse, C.; Didier, M.; Deutsch, D., et al. Malnutrition: Percentage and Association with Prognosis in Patients Hospitalized for Coronavirus Disease 2019. Nutrients 2020, 12, doi:10.3390/nu12123679.
6	Arai, M.; Inaba, R. [A case of tuberculous meningitis with pleural effusion as a manifestation of a paradoxical reaction during anti-tuberculosis therapy]. Rinsho Shinkeigaku 2019, 59, 541-544, doi:10.5692/clinicalneurol.cn-001309.
7	Auiwattanakul, S.; Chittawatanarat, K.; Chaiwat, O.; Morakul, S.; Kongsayreepong, S.; Ungpinitpong, W.; Yutthakasemsunt, S.; Buranapin, S. Effects of nutrition factors on mortality and sepsis occurrence in a multicenter university-based surgical intensive care unit in Thailand (THAI-SICU study). Nutrition 2019, 58, 94-99, doi:10.1016/j.nut.2018.06.021.
8	Azzolino, D.; Saporiti, E.; Proietti, M.; Cesari, M. Nutritional Considerations in Frail Older Patients with COVID-19. J Nutr Health Aging 2020, 24, 696-698, doi:10.1007/s12603-020-1400-x.
9	Bao, Q.; Zhou, H.; Chen, X.; Yang, Q.; Zhou, J. [Characteristics and Influencing Factors of Pathogenic Bacteria in Lung Cancer Chemotherapy Combined with Nosocomial Pulmonary Infection]. Zhongguo Fei Ai Za Zhi 2019, 22, 772-778, doi:10.3779/j.issn.1009-3419.2019.12.07.
10	Barazzoni, R.; Bischoff, S.C.; Breda, J.; Wickramasinghe, K.; Krznaric, Z.; Nitzan, D.; Pirlich, M.; Singer, P. ESPEN expert statements and practical guidance for nutritional management of individuals with SARS-CoV-2 infection. Clin Nutr 2020, 39, 1631-1638, doi:10.1016/j.clnu.2020.03.022.
11	Barreto, E.F.; Kanderi, T.; DiCecco, S.R.; Lopez-Ruiz, A.; Poyant, J.O.; Mara, K.C.; Heimgartner, J.; Gajic, O.; Rule, A.D.; Nystrom, E.M., et al. Sarcopenia Index Is a Simple Objective Screening Tool for Malnutrition in the Critically Ill. JPEN J Parenter Enteral Nutr 2019, 43, 780-788, doi:10.1002/jpen.1492.
12	Bedock, D.; Bel Lassen, P.; Mathian, A.; Moreau, P.; Couffignal, J.; Ciangura, C.; Poitou-Bernert, C.; Jeannin, A.C.; Mosbah, H.; Fadlallah, J., et al. Prevalence and severity of malnutrition in hospitalized COVID-19 patients. Clin Nutr ESPEN 2020, 40, 214-219, doi:10.1016/j.clnesp.2020.09.018.
13	Bellakhal, S.; Ouertani, S.; Antit, S.; Abdelaali, I.; Teyeb, Z.; Dougui, M.H. Iron deficiency anemia: clinical and etiological features. Tunis Med 2019, 97, 1389-1398.
14	Bencivenga, L.; Rengo, G.; Varricchi, G. Elderly at time of COronaVIrus disease 2019 (COVID-19): possible role of immunosenescence and malnutrition. Geroscience 2020, 42, 1089-1092, doi:10.1007/s11357-020-00218-9.
15	Bhandari, M.; Nautiyal, H.K.; Kosta, S.; Mathur, W.; Fobi, M. Comparison of one-anastomosis gastric bypass and Roux-en-Y gastric bypass for treatment of obesity: a 5-year study. Surg Obes Relat Dis 2019, 15, 2038-2044, doi:10.1016/j.soard.2019.05.025.
16	Bhandari, M.; Nautiyal, H.K.; Mathur, W.; Kosta, S. OAGB vs BGBP: A retrospective comparative study of a cohort of patients who had bariatric surgery in 2012 at one centre by a single surgeon. Clin Obes 2019, 9, e12308, doi:10.1111/cob.12308.
17	Blaauw, R.; Achar, E.; Dolman, R.C.; Harbron, J.; Moens, M.; Munyi, F.; Nyatefe, D.; Visser, J. The Problem of Hospital Malnutrition in the African Continent. Nutrients 2019, 11, doi:10.3390/nu11092028.
18	Bolayir, B.; Arik, G.; Yeşil, Y.; Kuyumcu, M.E.; Varan, H.D.; Kara, Ö.; Güngör, A.E.; Yavuz, B.B.; Cankurtaran, M.; Halil, M.G. Validation of Nutritional Risk Screening-2002 in a Hospitalized Adult Population. Nutr Clin Pract 2019, 34, 297-303, doi:10.1002/ncp.10082.
19	Borkent, J.W.; Naumann, E.; Vasse, E.; van der Heijden, E.; de van der Schueren, M.A.E. Prevalence and Determinants of Undernutrition in A Sample of Dutch Community-Dwelling Older Adults: Results from Two Online Screening Tools. Int J Environ Res Public Health 2019, 16, doi:10.3390/ijerph16091562.
20	Brook, K.; Otero, T.M.N.; Yeh, D.D.; Canales, C.; Belcher, D.; Quraishi, S.A. Admission 25-Hydroxyvitamin D Levels Are Associated With Functional Status at Time of Discharge from Intensive Care Unit in Critically Ill Surgical Patients. Nutr Clin Pract 2019, 34, 572-580, doi:10.1002/ncp.10196.
21	Budrewicz, S.; Zmarzły, A.; Rączka, D.; Szczepańska, A.; Koziorowska-Gawron, E.; Słotwiński, K.; Koszewicz, M. Clinical and nutritional correlations in Parkinson's disease: Preliminary report. Adv Clin Exp Med 2019, 28, 193-198, doi:10.17219/acem/76375.
22	Canales, C.; Elsayes, A.; Yeh, D.D.; Belcher, D.; Nakayama, A.; McCarthy, C.M.; Chokengarmwong, N.; Quraishi, S.A. Nutrition Risk in Critically Ill Versus the Nutritional Risk Screening 2002: Are They Comparable for Assessing Risk of Malnutrition in Critically Ill Patients? JPEN J Parenter Enteral Nutr 2019, 43, 81-87, doi:10.1002/jpen.1181.
23	Cardiac Critical Care Medicine Of China Internationgnal, E.; Promotion For, M.; Healthcare; Nutrition Support Expert Committee Of Chinese Cardiac Critical Care, M. [Chinese consensus guideline for nutrition support therapy in the perioperative period of adult cardiac surgery in 2019]. Zhonghua Wei Zhong Bing Ji Jiu Yi Xue 2019, 31, 801-810, doi:10.3760/cma.j.issn.2095-4352.2019.07.002.
24	Carli, F.; Bessissow, A.; Awasthi, R.; Liberman, S. Prehabilitation: finally utilizing frailty screening data. Eur J Surg Oncol 2020, 46, 321-325, doi:10.1016/j.ejso.2020.01.001.
25	Carlsen, A.; Grimstad, T.B.; Karlsen, L.N.; Greve, O.J.; Norheim, K.B.; Lea, D. A case of Ménétriere´s disease treated with the monoclonal antibody cetuximab. Clin J Gastroenterol 2019, 12, 562-565, doi:10.1007/s12328-019-00994-8.
26	Cawood, A.L.; Walters, E.R.; Smith, T.R.; Sipaul, R.H.; Stratton, R.J. A Review of Nutrition Support Guidelines for Individuals with or Recovering from COVID-19 in the Community. Nutrients 2020, 12, doi:10.3390/nu12113230.
27	Chanchani, D. Maternal and child nutrition in rural Chhattisgarh: the role of health beliefs and practices. Anthropol Med 2019, 26, 142-158, doi:10.1080/13648470.2017.1361654.
28	Chaneva, O.; Viteva, E.; Trenova, A.; Slavov, G.; Shukerski, K.; Manova, M.; Zahariev, Z. Neuromyelitis Optica and Systemic Lupus Erythematosus Association – the Chicken or the Egg Dilemma: a Case Repor. Folia Med (Plovdiv) 2019, 61, 639-642, doi:10.3897/folmed.61.e47947.
29	Chatindiara, I.; Williams, V.; Sycamore, E.; Richter, M.; Allen, J.; Wham, C. Associations between nutrition risk status, body composition and physical performance among community-dwelling older adults. Aust N Z J Public Health 2019, 43, 56-62, doi:10.1111/1753-6405.12848.
30	Chávez-Tostado, M.; Cervantes-Guevara, G.; López-Alvarado, S.E.; Cervantes-Pérez, G.; Barbosa-Camacho, F.J.; Fuentes-Orozco, C.; Hernández-Corona, D.M.; González-Heredia, T.; Cervantes-Cardona, G.A.; González-Ojeda, A. Comparison of nutritional screening tools to assess nutritional risk and predict clinical outcomes in Mexican patients with digestive diseases. BMC Gastroenterol 2020, 20, 79, doi:…
31	Chen, S.C.; Chung, W.S.; Wu, P.Y.; Huang, J.C.; Chiu, Y.W.; Chang, J.M.; Chen, H.C. Associations among Geriatric Nutrition Risk Index, bone mineral density, body composition and handgrip strength in patients receiving hemodialysis. Nutrition 2019, 65, 6-12, doi:10.1016/j.nut.2019.02.013.
32	Chen, X.; Chen, Y.; Wu, C.; Wei, M.; Xu, J.; Chao, Y.C.; Song, J.; Hou, D.; Zhang, Y.; Du, C., et al. Coagulopathy is a major extrapulmonary risk factor for mortality in hospitalized patients with COVID-19 with type 2 diabetes. BMJ Open Diabetes Res Care 2020, 8, doi:10.1136/bmjdrc-2020-001851.
33	Chopp-Hurley, J.N.; Wiebenga, E.G.; Keller, H.H.; Maly, M.R. Diet and Nutrition Risk Affect Mobility and General Health in Osteoarthritis: Data from the Canadian Longitudinal Study on Aging. J Gerontol A Biol Sci Med Sci 2020, 75, 2147-2155, doi:10.1093/gerona/glz277.
34	Chourdakis, M.; Grammatikopoulou, M.G.; Day, A.G.; Bouras, E.; Heyland, D.K. Are all low-NUTRIC-score patients the same? Analysis of a multi-center observational study to determine the relationship between nutrition intake and outcome. Clin Nutr 2019, 38, 2783-2789, doi:10.1016/j.clnu.2018.12.006.
35	Chourdakis, M.; Grammatikopoulou, M.G.; Poulia, K.A.; Passakiotou, M.; Pafili, Z.K.; Bouras, E.; Doundoulakis, I.; Galitsianos, I.; Lappa, T.; Karakatsanis, A., et al. Translation of the modified NUTRIC score and adaptation to the Greek ICU setting. Clin Nutr ESPEN 2019, 29, 72-76, doi:10.1016/j.clnesp.2018.12.003.
36	Chu, W.L.; Hao, D.F.; Zhao, J.F.; Feng, G.; Zhang, H.J.; Li, T.; Li, S.Y.; Chen, Z.Q.; Zhao, F.; Yao, D. [Clinical strategies for preservation of the exposed implant in chronic wounds and wound repair]. Zhonghua Shao Shang Za Zhi 2020, 36, 484-487, doi:10.3760/cma.j.cn501120-20190215-00027.
37	Compher, C.; Chittams, J.; Sammarco, T.; Higashibeppu, N.; Higashiguchi, T.; Heyland, D.K. Greater Nutrient Intake Is Associated With Lower Mortality in Western and Eastern Critically Ill Patients With Low BMI: A Multicenter, Multinational Observational Study. JPEN J Parenter Enteral Nutr 2019, 43, 63-69, doi:10.1002/jpen.1180.
38	Coruja, M.K.; Cobalchini, Y.; Wentzel, C.; Fink, J.D.S. Nutrition Risk Screening in Intensive Care Units: Agreement Between NUTRIC and NRS 2002 Tools. Nutr Clin Pract 2020, 35, 567-571, doi:10.1002/ncp.10419.
39	Cuevas, A.; Barquera, S. COVID-19, Obesity, and Undernutrition: A Major Challenge for Latin American Countries. Obesity (Silver Spring) 2020, 28, 1791-1792, doi:10.1002/oby.22961.
40	Danis, K.; Kline, M.; Munson, M.; Nickleach, J.; Hardik, H.; Valladares, A.F.; Steiber, A. Identifying and Managing Malnourished Hospitalized Patients Utilizing the Malnutrition Quality Improvement Initiative: The UPMC Experience. J Acad Nutr Diet 2019, 119, S40-s43, doi:10.1016/j.jand.2019.05.020.
41	Davison, K.M.; Lung, Y.; Lin, S.L.; Tong, H.; Kobayashi, K.M.; Fuller-Thomson, E. Depression in middle and older adulthood: the role of immigration, nutrition, and other determinants of health in the Canadian longitudinal study on aging. BMC Psychiatry 2019, 19, 329, doi:10.1186/s12888-019-2309-y.
42	de Andrade Silva Cavalcanti, R.; Diniz, A.D.S.; de Arruda, I.K.G. Concentrations of Intra-erythrocyte Folate, Serum Vitamin B12, and Hemoglobin in Women of Childbearing Age and Associated Factors. J Am Coll Nutr 2019, 38, 739-745, doi:10.1080/07315724.2019.1592725.
43	De Lorenzo, R.; Conte, C.; Lanzani, C.; Benedetti, F.; Roveri, L.; Mazza, M.G.; Brioni, E.; Giacalone, G.; Canti, V.; Sofia, V., et al. Residual clinical damage after COVID-19: A retrospective and prospective observational cohort study. PLoS One 2020, 15, e0239570, doi:10.1371/journal.pone.0239570.
44	Dent, E.; Hoogendijk, E.O.; Visvanathan, R.; Wright, O.R.L. Malnutrition Screening and Assessment in Hospitalised Older People: a Review. J Nutr Health Aging 2019, 23, 431-441, doi:10.1007/s12603-019-1176-z.
45	Ding, J.Z.; Kong, C.; Sun, X.Y.; Lu, S.B. Perioperative Complications And Risk Factors In Degenerative Lumbar Scoliosis Surgery For Patients Older Than 70 Years Of Age. Clin Interv Aging 2019, 14, 2195-2203, doi:10.2147/cia.s218204.
46	Ding, W.; Tan, Y.; Qian, Y.; Xue, W.; Wang, Y.; Xi, C.; Gu, K.; Xu, Y.; Xu, X. Primary plasmablastic plasmacytoma in the stomach of an immunocompetent adult: A case report. Medicine (Baltimore) 2019, 98, e14235, doi:10.1097/md.0000000000014235.
47	Dou, L.; Wang, X.; Cao, Y.; Hu, A.; Li, L. Relationship between Postoperative Recovery and Nutrition Risk Screened by NRS 2002 and Nutrition Support Status in Patients with Gastrointestinal Cancer. Nutr Cancer 2020, 72, 33-40, doi:10.1080/01635581.2019.1612927.
48	Eslamian, G.; Ardehali, S.H.; Vahdat Shariatpanahi, Z. Association of intestinal permeability with a NUTRIC score in critically ill patients. Nutrition 2019, 63-64, 1-8, doi:10.1016/j.nut.2019.01.010.
49	Esteves, C.V.; Freitas, R.S.; Campos, W.G.; Shimabukuro, N.; Thomaz, D.Y.; Cordas, T.; Benard, G.; Witzel, A.L.; Lemos, C.A. Oral yeast colonization in patients with eating disorders: commensal acquisition or due to purgative habits? Rev Inst Med Trop Sao Paulo 2020, 62, e32, doi:10.1590/s1678-9946202062032.
50	Formisano, E.; Di Maio, P.; Ivaldi, C.; Sferrazzo, E.; Arieta, L.; Bongiovanni, S.; Panizzi, L.; Valentino, E.; Pasta, A.; Giudice, M., et al. Nutritional therapy for patients with coronavirus disease 2019 (COVID-19): Practical protocol from a single center highly affected by an outbreak of the novel severe acute respiratory syndrome coronavirus 2 (SARS-CoV-2) infection. Nutrition 2021, 82, 11104…
51	Freitas, J.; Bliven, P.; Case, R. Combined zinc and vitamin B6 deficiency in a patient with diffuse red rash and angular cheilitis 6 years after Roux-en-Y gastric bypass. BMJ Case Rep 2019, 12, doi:10.1136/bcr-2019-230605.
52	Gambaro, R.C.; Seoane, A.; Padula, G. Oxidative Stress and Genomic Damage Induced In Vitro in Human Peripheral Blood by Two Preventive Treatments of Iron Deficiency Anemia. Biol Trace Elem Res 2019, 190, 318-326, doi:10.1007/s12011-018-1576-7.
53	Gao, F.; Xu, Y.; Yang, G. Pseudo-pseudo Meigs' syndrome presenting with a combination of polyserositis, elevated serum CA 125 in systemic lupus erythematosus: A case report. Medicine (Baltimore) 2019, 98, e15393, doi:10.1097/md.0000000000015393.
54	Garretto, D.; Kim, Y.K.; Quadro, L.; Rhodas, R.R.; Pimentel, V.; Crnosija, N.A.; Nie, L.; Bernstein, P.; Tropper, P.; Neal-Perry, G.S. Vitamin A and β-carotene in pregnant and breastfeeding post-bariatric women in an urban population. J Perinat Med 2019, 47, 183-189, doi:10.1515/jpm-2018-0142.
55	Gebreegziabher, T.; Roice, T.; Stoecker, B.J. Chronic inflammation was a major predictor and determinant factor of anemia in lactating women in Sidama zone southern Ethiopia: A cross-sectional study. PLoS One 2020, 15, e0240254, doi:10.1371/journal.pone.0240254.
56	Georgiou, A.; Papatheodoridis, G.V.; Alexopoulou, A.; Deutsch, M.; Vlachogiannakos, I.; Ioannidou, P.; Papageorgiou, M.V.; Papadopoulos, N.; Tsibouris, P.; Prapa, A., et al. Evaluation of the effectiveness of eight screening tools in detecting risk of malnutrition in cirrhotic patients: the KIRRHOS study. Br J Nutr 2019, 122, 1368-1376, doi:10.1017/s0007114519002277.
57	Gomes, A.; Hutcheon, D.; Ziegler, J. Association Between Fat-Free Mass and Pulmonary Function in Patients With Cystic Fibrosis: A Narrative Review. Nutr Clin Pract 2019, 34, 715-727, doi:10.1002/ncp.10251.
58	Gómez-Cantarino, S.; Agulló-Ortuño, M.T.; de Dios-Aguado, M.; Ugarte-Gurrutxaga, M.I.; Bouzas-Mosquera, C. Prevalence of Hypoproteinemia and Hypoalbuminemia in Pregnant Women from Three Different Socioeconomic Populations. Int J Environ Res Public Health 2020, 17, doi:10.3390/ijerph17176275.
59	Gualtieri, P.; Falcone, C.; Romano, L.; Macheda, S.; Correale, P.; Arciello, P.; Polimeni, N.; Lorenzo, A. Body Composition Findings by Computed Tomography in SARS-CoV-2 Patients: Increased Risk of Muscle Wasting in Obesity. Int J Mol Sci 2020, 21, doi:10.3390/ijms21134670.
60	Guzmán-Olea, E.; Agis-Juárez, R.A.; Bermúdez-Morales, V.H.; Torres-Poveda, K.; Madrid-Marina, V.; López-Romero, D.; Maya-Pérez, E. Health status and gerontological evaluation in Mexican older adults in the face of the COVID-19 pandemic. Gac Med Mex 2020, 156, 412-417, doi:10.24875/gmm.m20000429.
61	Han, X.; Liu, X.; Chen, L.; Wang, Y.; Li, H.; Zhou, F.; Xing, X.; Zhang, C.; Suo, L.; Wang, J., et al. Disease burden and prognostic factors for clinical failure in elderly community acquired pneumonia patients. BMC Infect Dis 2020, 20, 668, doi:10.1186/s12879-020-05362-3.
62	Hartz, L.L.K.; Stroup, B.M.; Bibelnieks, T.A.; Shockey, C.; Ney, D.M. ThedaCare Nutrition Risk Screen Improves the Identification of Non-Intensive Care Unit Patients at Risk for Malnutrition Compared With the Nutrition Risk Screen 2002. JPEN J Parenter Enteral Nutr 2019, 43, 70-80, doi:10.1002/jpen.1315.
63	Hauner, H.; Kocsis, A.; Jaeckel, B.; Martignoni, M.; Hauner, D.; Holzapfel, C. [Prevalence of malnutrition risk in patients of cancer outpatient clinics - a cross-sectional survey]. Dtsch Med Wochenschr 2020, 145, e1-e9, doi:10.1055/a-1008-5702.
64	Hiller, L.D.; Metzger, L.S. Identifying Critically Ill Veterans Who Require Nutrition Intervention: A Quality Improvement Study Comparing Nutrition Risk Tools. Nutr Clin Pract 2019, 34, 414-420, doi:10.1002/ncp.10235.
65	Horsley, B.; Cottam, D.; Cottam, A.; Cottam, S.; Zaveri, H.; Surve, A.; Medlin, W. Bowel Reconstruction to Treat Chronic Diarrhea and Hypoproteinemia Following Single Anastomosis Duodenal-Ileal Bypass with Sleeve Gastrectomy: a Single-Site Experience. Obes Surg 2019, 29, 2387-2391, doi:10.1007/s11695-019-03847-y.
66	Hu, Y.; Chen, M.; Song, Y.; Liu, X.; Gou, F.; Zhang, J.; Huang, Y. Study of L-Asparaginase, Vincristine, and Dexamethasone Combined With Intensity-modulated Radiation Therapy in Early-Stage Nasal NK/T-Cell Lymphoma. Am J Clin Oncol 2020, 43, 257-262, doi:10.1097/coc.0000000000000647.
67	Huang, W.; Li, C.; Wang, Z.; Wang, H.; Zhou, N.; Jiang, J.; Ni, L.; Zhang, X.A.; Wang, D.W. Decreased serum albumin level indicates poor prognosis of COVID-19 patients: hepatic injury analysis from 2,623 hospitalized cases. Sci China Life Sci 2020, 63, 1678-1687, doi:10.1007/s11427-020-1733-4.
68	Hussien, B.; Hussen, M.M.; Seid, A.; Hussen, A. Nutritional deficiency and associated factors among new pulmonary tuberculosis patients of Bale Zone Hospitals, southeast Ethiopia. BMC Res Notes 2019, 12, 751, doi:10.1186/s13104-019-4786-y.
69	Hutchins-Wiese, H.L.; Walsh, S.E. Frailty and Nutrition Risk Screening in Home-Delivered Meal Clients. J Nutr Gerontol Geriatr 2020, 39, 114-130, doi:10.1080/21551197.2020.1719258.
70	Iida, T.; Hirayama, D.; Sudo, G.; Mitsuhashi, K.; Igarashi, H.; Yamashita, K.; Yamano, H.; Nakase, H. Chronic intestinal pseudo-obstruction due to al amyloidosis: a case report and literature review. Clin J Gastroenterol 2019, 12, 176-181, doi:10.1007/s12328-018-0909-6.
71	Javid Mishamandani, Z.; Norouzy, A.; Hashemian, S.M.; Khoundabi, B.; Rezaeisadrabadi, M.; Safarian, M.; Nematy, M.; Pournik, O.; Jamialahmadi, T.; Shadnoush, M., et al. Nutritional status of patients hospitalized in the intensive care unit: A comprehensive report from Iranian hospitals, 2018. J Crit Care 2019, 54, 151-158, doi:10.1016/j.jcrc.2019.08.001.
72	Jenkins, B.; Calder, P.C.; Marino, L.V. Evaluation of implementation of fasting guidelines for enterally fed critical care patients. Clin Nutr 2019, 38, 252-257, doi:10.1016/j.clnu.2018.01.024.
73	Jeong, D.H.; Hong, S.B.; Lim, C.M.; Koh, Y.; Seo, J.; Kim, Y.; Min, J.Y.; Huh, J.W. Relationship between Nutrition Intake and 28-Day Mortality Using Modified NUTRIC Score in Patients with Sepsis. Nutrients 2019, 11, doi:10.3390/nu11081906.
74	Jin, Y.; Zhang, T.; Ye, W.; Zhu, X.; Wang, L.; Wang, X. Clinical profile and associated factors of pulmonary involvement in primary Sjögren's syndrome. Med Clin (Barc) 2019, 153, 305-311, doi:10.1016/j.medcli.2019.01.016.
75	Kakushima, N.; Aizawa, D.; Yoshida, M.; Ito, S.; Satoh, T.; Ono, H.; Terashima, M.; Kagawa, H.; Shimoda, T. A Rare Case of Hypertrophic Gastropathy with Adenocarcinoma Arising from a Gastric-type Adenoma. Intern Med 2019, 58, 1877-1883, doi:10.2169/internalmedicine.2355-18.
76	Katalinic, L.; Premuzic, V.; Basic-Jukic, N.; Barisic, I.; Jelakovic, B. Hypoproteinemia as a factor in assessing malnutrition and predicting survival on hemodialysis. J Artif Organs 2019, 22, 230-236, doi:10.1007/s10047-019-01098-3.
77	Keller, H.H.; Valaitis, R.; Laur, C.V.; McNicholl, T.; Xu, Y.; Dubin, J.A.; Curtis, L.; Obiorah, S.; Ray, S.; Bernier, P., et al. Multi-site implementation of nutrition screening and diagnosis in medical care units: Success of the More-2-Eat project. Clin Nutr 2019, 38, 897-905, doi:10.1016/j.clnu.2018.02.009.
78	Khalife, R.; Grieco, A.; Khamisa, K.; Tinmouh, A.; McCudden, C.; Saidenberg, E. Scurvy, an old story in a new time: The hematologist's experience. Blood Cells Mol Dis 2019, 76, 40-44, doi:10.1016/j.bcmd.2019.01.004.
79	Kovač, V.; Reljič, M.; Bizjak, T. Causes of Massive Vulvar Edema in Patients with Severe Ovarian Hyperstimulation Syndrome: A Case Report and Literature Review. Am J Case Rep 2019, 20, 238-241, doi:10.12659/ajcr.913149.
80	Kubuga, C.K.; Hong, H.G.; Song, W.O. Hibiscus sabdariffa Meal Improves Iron Status of Childbearing Age Women and Prevents Stunting in Their Toddlers in Northern Ghana. Nutrients 2019, 11, doi:10.3390/nu11010198.
81	Lee, Z.Y.; Heyland, D.K. Determination of Nutrition Risk and Status in Critically Ill Patients: What Are Our Considerations? Nutr Clin Pract 2019, 34, 96-111, doi:10.1002/ncp.10214.
82	Li, T.; Zhang, Y.; Gong, C.; Wang, J.; Liu, B.; Shi, L.; Duan, J. Prevalence of malnutrition and analysis of related factors in elderly patients with COVID-19 in Wuhan, China. Eur J Clin Nutr 2020, 74, 871-875, doi:10.1038/s41430-020-0642-3.
83	Li, X.; Wang, L.; Yan, S.; Yang, F.; Xiang, L.; Zhu, J.; Shen, B.; Gong, Z. Clinical characteristics of 25 death cases with COVID-19: A retrospective review of medical records in a single medical center, Wuhan, China. Int J Infect Dis 2020, 94, 128-132, doi:10.1016/j.ijid.2020.03.053.
84	Lian, X.; Wu, M.; Fan, H.; Zhang, Y.; Sun, P. Wernicke's encephalopathy due to malnutrition and parenteral nutrition in a patient with cerebral infarction: A case report. Medicine (Baltimore) 2020, 99, e19799, doi:10.1097/md.0000000000019799.
85	Liang, X.; Shu, W.; Linyong, Z.; Jianshui, L.; Junqing, G.; Enzhu, D.; Mingqing, X. Preoperative nutritional evaluation of patients with hepatic alveolar echinococcosis. PLoS One 2020, 15, e0229396, doi:10.1371/journal.pone.0229396.
86	Liao, R.Q.; Lin, X.J.; Li, X.L.; Ni, X.; Luo, W.F.; Zhao, P.; Chen, J.; Wei, J.; Zou, X.L. [Short-Term Efficacy and Safety Profile of Generic Bortezomib in the Treatment of Multiple Myeloma]. Zhongguo Shi Yan Xue Ye Xue Za Zhi 2021, 29, 137-144, doi:10.19746/j.cnki.issn.1009-2137.2021.01.022.
87	Lidoriki, I.; Frountzas, M.; Schizas, D. Could nutritional and functional status serve as prognostic factors for COVID-19 in the elderly? Med Hypotheses 2020, 144, 109946, doi:10.1016/j.mehy.2020.109946.
88	Lin, G.; Yuan, L.; Bai, L.; Liu, Y.; Wang, Y.; Qiu, Z. Successful treatment of a patient with severe thallium poisoning in a coma using Prussian blue and plasma exchange: A case report. Medicine (Baltimore) 2019, 98, e14629, doi:10.1097/md.0000000000014629.
89	Lin, S.; Leppla, I.E.; Yan, H.; Probert, J.M.; Randhawa, P.A.; Leoutsakos, J.S.; Probasco, J.C.; Neufeld, K.J. Prevalence and Improvement of Caine-Positive Wernicke-Korsakoff Syndrome in Psychiatric Inpatient Admissions. Psychosomatics 2020, 61, 31-38, doi:10.1016/j.psym.2019.08.002.
90	Lin, Y.M.; Wang, M.; Sun, N.X.; Liu, Y.Y.; Yin, T.F.; Chen, C. Screening and application of nutritional support in elderly hospitalized patients of a tertiary care hospital in China. PLoS One 2019, 14, e0213076, doi:10.1371/journal.pone.0213076.
91	Ling, L.L.; Chan, Y.M.; Mat Daud, Z. Serum potassium and handgrip strength as predictors of sleep quality among hemodialysis patients in Malaysia. Asia Pac J Clin Nutr 2019, 28, 401-410, doi:10.6133/apjcn.201906_28(2).0023.
92	Liu, G.; Zhang, S.; Mao, Z.; Wang, W.; Hu, H. Clinical significance of nutritional risk screening for older adult patients with COVID-19. Eur J Clin Nutr 2020, 74, 876-883, doi:10.1038/s41430-020-0659-7.
93	Liu, H.; Shang, N.; Chhetri, J.K.; Liu, L.; Guo, W.; Li, P.; Guo, S.; Ma, L. A Frailty Screening Questionnaire (FSQ) to Rapidly Predict Negative Health Outcomes of Older Adults in Emergency Care Settings. J Nutr Health Aging 2020, 24, 627-633, doi:10.1007/s12603-020-1374-8.
94	Lomer, M.C.E.; Cahill, O.; Baschali, A.; Partha Sarathy, P.; Sarantidou, M.; Mantzaris, G.J.; Gaya, D.R.; Katsanos, K.; Christodoulou, D.K.; Gerasimidis, K. A multicentre Study of Nutrition Risk Assessment in Adult Patients with Inflammatory Bowel Disease Attending Outpatient Clinics. Ann Nutr Metab 2019, 74, 18-23, doi:10.1159/000495214.
95	Lovesley, D.; Parasuraman, R.; Ramamurthy, A. Combating hospital malnutrition: Dietitian-led quality improvement initiative. Clin Nutr ESPEN 2019, 30, 19-25, doi:10.1016/j.clnesp.2019.02.011.
96	Lu, C.; Zuo, K.; Le, W.; Chen, W.; Qin, W.; Zhang, F.; Liang, S.; Zeng, C.; Wang, J. Characterization of thromboelastography of patients with different pathological types of nephrotic syndrome. Medicine (Baltimore) 2020, 99, e18960, doi:10.1097/md.0000000000018960.
97	Ma, X.; Xu, H.; Sun, J.Y.; Gedara, Y.S.S.; Sun, F. Idiopathic membranous nephropathy in a patient diagnosed with IgG4-related disease: A case report. Medicine (Baltimore) 2020, 99, e22817, doi:10.1097/md.0000000000022817.
98	Maciel, L.; Franzosi, O.S.; Nunes, D.S.L.; Loss, S.H.; Dos Reis, A.M.; Rubin, B.A.; Vieira, S.R.R. Nutritional Risk Screening 2002 Cut-Off to Identify High-Risk Is a Good Predictor of ICU Mortality in Critically Ill Patients. Nutr Clin Pract 2019, 34, 137-141, doi:10.1002/ncp.10185.
99	Man, Y.N.; Chen, Y.F. Systemic immune-inflammation index, serum albumin, and fibrinogen impact prognosis in castration-resistant prostate cancer patients treated with first-line docetaxel. Int Urol Nephrol 2019, 51, 2189-2199, doi:10.1007/s11255-019-02265-4.
100	Martin, L.; Gillis, C.; Atkins, M.; Gillam, M.; Sheppard, C.; Buhler, S.; Hammond, C.B.; Nelson, G.; Gramlich, L. Implementation of an Enhanced Recovery After Surgery Program Can Change Nutrition Care Practice: A Multicenter Experience in Elective Colorectal Surgery. JPEN J Parenter Enteral Nutr 2019, 43, 206-219, doi:10.1002/jpen.1417.
101	Matsusaka, Y.; Nakahara, T.; Iwabuchi, Y.; Owaki, Y.; Narimatsu, H.; Jinzaki, M. Egested Feces Revealed Massive Protein Loss in 99mTc-HSA-D Scintigraphy. Clin Nucl Med 2020, 45, e329-e330, doi:10.1097/rlu.0000000000003080.
102	McLoughlin, R.J.; McKie, K.; Hirsh, M.P.; Cleary, M.A.; Aidlen, J.T. Impact of Nutritional Deficiencies on Children and Young Adults with Crohn's Disease Undergoing Intraabdominal Surgery. J Pediatr Surg 2020, 55, 1556-1561, doi:10.1016/j.jpedsurg.2019.10.012.
103	Miao, Y.Y.; Zhang, W.C.; Han, X.B.; Wang, Z.X. [Effect of modified double negative-pressure wound therapy combined with debridement and tension-reduced suture in treatment of patients with stage 4 pressure sores and infection in sacrococcygeal region and its surrounding area]. Zhonghua Shao Shang Za Zhi 2020, 36, 540-546, doi:10.3760/cma.j.cn501120-20200304-00118.
104	Morrison, J.M.; Laur, C.V.; Keller, H.H. SCREEN III: working towards a condensed screening tool to detect nutrition risk in community-dwelling older adults using CLSA data. Eur J Clin Nutr 2019, 73, 1260-1269, doi:10.1038/s41430-019-0411-3.
105	Mosli, M.H.; Albeshri, M.A.; Alsolami, A.A.; Addas, F.A.; Qazli, A.M.; Alsahafi, M.; Jawa, H.; Alkhaldy, A.; Qari, Y. Arabic translation and psychometric testing of the self-screening malnutrition universal screening tool in inflammatory bowel disease patients. Saudi Med J 2019, 40, 828-835, doi:10.15537/smj.2019.8.24427.
106	Mota, J.O.; Tounian, P.; Guillou, S.; Pierre, F.; Membré, J.M. Estimation of the Burden of Iron Deficiency Anemia in France from Iron Intake: Methodological Approach. Nutrients 2019, 11, doi:10.3390/nu11092045.
107	Motta, J.C.; Novoa, D.J.; Gómez, C.C.; Moreno, J.M.; Vargas, L.; Pérez, J.; Millán, H.; Arango Á, I. Prognostic factors in hospitalized patients diagnosed with SARS-CoV-2 infection, Bogotá, Colombia. Biomedica 2020, 40, 116-130, doi:10.7705/biomedica.5764.
108	Mu, X.M.; Wang, W.; Jiang, Y.Y.; Feng, J. Patterns of Comorbidity in Hepatocellular Carcinoma: A Network Perspective. Int J Environ Res Public Health 2020, 17, doi:10.3390/ijerph17093108.
109	Müller, M.; Dahdal, S.; Saffarini, M.; Uehlinger, D.; Arampatzis, S. Evaluation of Nutrition Risk Screening Score 2002 (NRS) assessment in hospitalized chronic kidney disease patient. PLoS One 2019, 14, e0211200, doi:10.1371/journal.pone.0211200.
110	Murkamilov, I.T.; Sabirov, I.S.; Fomin, V.V.; Aitbaev, K.A.; Murkamilova, Z.A.; Rayimjanov, Z.R.; Redjapova, N.A.; Yusupov, F.A. [Bilateral impact of cardiorenal relationships in the nephrotic syndrome.]. Klin Lab Diagn 2019, 64, 196-203, doi:10.18821/0869-2084-2019-64-4-196-203.
111	Nabil, T.M.; Khalil, A.H.; Mikhail, S.; Soliman, S.S.; Aziz, M.; Antoine, H. Conventional Versus Distal Laparoscopic One-Anastomosis Gastric Bypass: a Randomized Controlled Trial with 1-Year Follow-up. Obes Surg 2019, 29, 3103-3110, doi:10.1007/s11695-019-03991-5.
112	Neto, M.L.R.; de Souza, R.I.; Quezado, R.M.M.; Mendonça, E.C.S.; de Araújo, T.I.; Luz, D.; de Santana, W.J.; Sampaio, J.R.F.; Carvalho, P.M.M.; Arrais, T., et al. When basic supplies are missing, what to do? Specific demands of the local street population in times of coronavirus - a concern of social psychiatry. Psychiatry Res 2020, 288, 112939, doi:10.1016/j.psychres.2020.112939.
113	Niles, M.T.; Bertmann, F.; Belarmino, E.H.; Wentworth, T.; Biehl, E.; Neff, R. The Early Food Insecurity Impacts of COVID-19. Nutrients 2020, 12, doi:10.3390/nu12072096.
114	Novosad, P.; Jain, R.; Campion, A.; Asher, S. COVID-19 mortality effects of underlying health conditions in India: a modelling study. BMJ Open 2020, 10, e043165, doi:10.1136/bmjopen-2020-043165.
115	Ochoa, J.B.; Cárdenas, D.; Goiburu, M.E.; Bermúdez, C.; Carrasco, F.; Correia, M. Lessons Learned in Nutrition Therapy in Patients With Severe COVID-19. JPEN J Parenter Enteral Nutr 2020, 44, 1369-1375, doi:10.1002/jpen.2005.
116	Oh, S.Y.; Koh, S.J.; Baek, J.Y.; Kwon, K.A.; Jeung, H.C.; Lee, K.H.; Won, Y.W.; Lee, H.J. Validity and Reliability of Korean Version of Simplified Nutritional Appetite Questionnaire in Patients with Advanced Cancer: A Multicenter, Longitudinal Study. Cancer Res Treat 2019, 51, 1612-1619, doi:10.4143/crt.2018.505.
117	Otero, T.M.N.; Canales, C.; Yeh, D.D.; Elsayes, A.; Belcher, D.M.; Quraishi, S.A. Vitamin D Status Is Associated With Development of Hospital-Acquired Pressure Injuries in Critically Ill Surgical Patients. Nutr Clin Pract 2019, 34, 142-147, doi:10.1002/ncp.10184.
118	Pappalardo, A.; Currenti, W.; Ponzio, R.; Mellini, G.; Nicolosi, D.; Longhitano, L.; Tibullo, D.; Castorina, S.; Palumbo, G. Effects of micronised microencapsulated ferric pyrophosphate supplementation in patients with advanced cancer and iron deficiency: a single-centre cohort pilot study. Blood Transfus 2019, 17, 196-199, doi:10.2450/2019.0181-18.
119	Pascal, P.; Malloizel, J.; Lairez, O.; de Volontat, M.D.; Bournet, B. Primary Intestinal Lymphangiectasia: Diagnostic Accuracy of 99mTc-Labeled Human Serum Albumin Nanocolloid SPECT/CT Before Biopsy. Clin Nucl Med 2021, 46, e34-e35, doi:10.1097/rlu.0000000000003285.
120	Paslakis, G.; Richardson, C.; Nöhre, M.; Brähler, E.; Holzapfel, C.; Hilbert, A.; de Zwaan, M. Prevalence and psychopathology of vegetarians and vegans - Results from a representative survey in Germany. Sci Rep 2020, 10, 6840, doi:10.1038/s41598-020-63910-y.
121	Patel, S.; Gómez, V. A Case of Ascending Sensory Neuropathy Due to Acute Onset Thiamine Deficiency After Intragastric Balloon Placement. Obes Surg 2019, 29, 3404-3405, doi:10.1007/s11695-019-03967-5.
122	Pena, G.; Kuang, B.; Cowled, P.; Howell, S.; Dawson, J.; Philpot, R.; Fitridge, R. Micronutrient Status in Diabetic Patients with Foot Ulcers. Adv Wound Care (New Rochelle) 2020, 9, 9-15, doi:10.1089/wound.2019.0973.
123	Purcell, S.A.; Elliott, S.A.; Ryan, A.M.; Sawyer, M.B.; Prado, C.M. Accuracy of a Portable Indirect Calorimeter for Measuring Resting Energy Expenditure in Individuals With Cancer. JPEN J Parenter Enteral Nutr 2019, 43, 145-151, doi:10.1002/jpen.1310.
124	Raina, A.J.; Gilbar, P.J.; Grewal, G.D.; Holcombe, D.J. Optic neuritis induced by 5-fluorouracil chemotherapy: Case report and review of the literature. J Oncol Pharm Pract 2020, 26, 511-516, doi:10.1177/1078155219886640.
125	Rashvand, F.; Shamekhi, L.; Rafiei, H.; Nosrataghaei, M. Incidence and risk factors for medical device-related pressure ulcers: The first report in this regard in Iran. Int Wound J 2020, 17, 436-442, doi:10.1111/iwj.13290.
126	Rong, Y.D.; Bian, A.L.; Hu, H.Y.; Ma, Y.; Zhou, X.Z. A cross-sectional study of the relationships between different components of sarcopenia and brachial ankle pulse wave velocity in community-dwelling elderly. BMC Geriatr 2020, 20, 115, doi:10.1186/s12877-020-01525-8.
127	Saad, M.; Le Clec'h, B.; Dhonneur, G. Hypoalbuminemia-Related Prolonged Sedation After General Anesthesia: A Case Report. A A Pract 2020, 14, e01180, doi:10.1213/xaa.0000000000001180.
128	Sauer, A.C.; Goates, S.; Malone, A.; Mogensen, K.M.; Gewirtz, G.; Sulz, I.; Moick, S.; Laviano, A.; Hiesmayr, M. Prevalence of Malnutrition Risk and the Impact of Nutrition Risk on Hospital Outcomes: Results From nutritionDay in the U.S. JPEN J Parenter Enteral Nutr 2019, 43, 918-926, doi:10.1002/jpen.1499.
129	Saxena, A.; Amin, A.; Mohan, S.B.; Mohan, P. Food Insecurity in Tribal High Migration Communities in Rajasthan, India. Food Nutr Bull 2020, 41, 513-518, doi:10.1177/0379572120967163.
130	Schwam, Z.G.; Ferrandino, R.; Kaul, V.Z.; Wanna, G.B.; Cosetti, M.K. Thirty-Day Readmission and Prolonged Length of Stay in Malignant Otitis Externa. Laryngoscope 2020, 130, 2220-2228, doi:10.1002/lary.28409.
131	Serrano, O.K.; Kutzler, H.L.; Rochon, C.; Radojevic, J.A.; Lawlor, M.T.; Hammond, J.A.; Gluck, J.; Feingold, A.D.; Jaiswal, A. Incidental COVID-19 in a heart-kidney transplant recipient with malnutrition and recurrent infections: Implications for the SARS-CoV-2 immune response. Transpl Infect Dis 2020, 22, e13367, doi:10.1111/tid.13367.
132	Shaikh, H.; Faisal, M.S.; Mewawalla, P. Vitamin C deficiency: rare cause of severe anemia with hemolysis. Int J Hematol 2019, 109, 618-621, doi:10.1007/s12185-018-02575-w.
133	Sheean, P.; Farrar, I.C.; Sulo, S.; Partridge, J.; Schiffer, L.; Fitzgibbon, M. Nutrition risk among an ethnically diverse sample of community-dwelling older adults. Public Health Nutr 2019, 22, 894-902, doi:10.1017/s1368980018002902.
134	Shi, B.; Liu, S.; Chen, J.; Liu, J.; Luo, Y.; Long, L.; Lan, Q.; Zhang, Y. Sarcopenia is Associated with Perioperative Outcomes in Gastric Cancer Patients Undergoing Gastrectomy. Ann Nutr Metab 2019, 75, 213-222, doi:10.1159/000504283.
135	Shi, M.; Chen, L.; Yang, Y.; Zhang, J.; Xu, J.; Xu, G.; Li, B.; Yin, Y. Analysis of clinical features and outcomes of 161 patients with severe and critical COVID-19: A multicenter descriptive study. J Clin Lab Anal 2020, 34, e23415, doi:10.1002/jcla.23415.
136	Shi, S.; Qin, M.; Shen, B.; Cai, Y.; Liu, T.; Yang, F.; Gong, W.; Liu, X.; Liang, J.; Zhao, Q., et al. Association of Cardiac Injury With Mortality in Hospitalized Patients With COVID-19 in Wuhan, China. JAMA Cardiol 2020, 5, 802-810, doi:10.1001/jamacardio.2020.0950.
137	Shivakoti, R.; Ewald, E.R.; Gupte, N.; Yang, W.T.; Kanyama, C.; Cardoso, S.W.; Santos, B.; Supparatpinyo, K.; Badal-Faesen, S.; Lama, J.R., et al. Effect of baseline micronutrient and inflammation status on CD4 recovery post-cART initiation in the multinational PEARLS trial. Clin Nutr 2019, 38, 1303-1309, doi:10.1016/j.clnu.2018.05.014.
138	Shrestha, A.; Six, J.; Dahal, D.; Marks, S.; Meierhofer, R. Association of nutrition, water, sanitation and hygiene practices with children's nutritional status, intestinal parasitic infections and diarrhoea in rural Nepal: a cross-sectional study. BMC Public Health 2020, 20, 1241, doi:10.1186/s12889-020-09302-3.
139	Silva, D.F.O.; Lima, S.; Sena-Evangelista, K.C.M.; Marchioni, D.M.; Cobucci, R.N.; Andrade, F.B. Nutritional Risk Screening Tools for Older Adults with COVID-19: A Systematic Review. Nutrients 2020, 12, doi:10.3390/nu12102956.
140	Siriwardhane, T.; Krishna, K.; Devarajan, K.; Ranganathan, V.; Jayaraman, V.; Wang, T.; Bei, K.; Rajasekaran, J.J.; Krishnamurthy, H. Insights into cardiovascular risk and nutritional status in subjects with wheat-related disorders. Biomarkers 2019, 24, 303-307, doi:10.1080/1354750x.2019.1578829.
141	Skipper, A.; Coltman, A.; Tomesko, J.; Charney, P.; Porcari, J.; Piemonte, T.A.; Handu, D.; Cheng, F.W. Adult Malnutrition (Undernutrition) Screening: An Evidence Analysis Center Systematic Review. J Acad Nutr Diet 2020, 120, 669-708, doi:10.1016/j.jand.2019.09.010.
142	Smith, M.L.; Bergeron, C.D.; Lachenmayr, S.; Eagle, L.A.; Simon, J.R. A Brief Intervention for Malnutrition among Older Adults: Stepping Up Your Nutrition. Int J Environ Res Public Health 2020, 17, doi:10.3390/ijerph17103590.
143	Stelle, I.; Kalea, A.Z.; Pereira, D.I.A. Iron deficiency anaemia: experiences and challenges. Proc Nutr Soc 2019, 78, 19-26, doi:10.1017/s0029665118000460.
144	Stoppe, C.; Ney, J.; Lomivorotov, V.V.; Efremov, S.M.; Benstoem, C.; Hill, A.; Nesterova, E.; Laaf, E.; Goetzenich, A.; McDonald, B., et al. Prediction of Prolonged ICU Stay in Cardiac Surgery Patients as a Useful Method to Identify Nutrition Risk in Cardiac Surgery Patients: A Post Hoc Analysis of a Prospective Observational Study. JPEN J Parenter Enteral Nutr 2019, 43, 768-779, doi:10.1002/jpen…
145	Sumbana, J.; Sacarlal, J.; Rubino, S. Air pollution and other risk factors might buffer COVID-19 severity in Mozambique. J Infect Dev Ctries 2020, 14, 994-1000, doi:10.3855/jidc.13057.
146	Thomas, J.; Kaambwa, B.; Delaney, C.; Miller, M. An evaluation of the validity of nutrition screening and assessment tools in patients admitted to a vascular surgery unit. Br J Nutr 2019, 122, 689-697, doi:10.1017/s0007114519001442.
147	Tsai, M.H.; Huang, H.C.; Peng, Y.S.; Chen, Y.C.; Tian, Y.C.; Yang, C.W.; Lien, J.M.; Fang, J.T.; Hou, M.C.; Shen, C.H., et al. Nutrition Risk Assessment Using the Modified NUTRIC Score in Cirrhotic Patients with Acute Gastroesophageal Variceal Bleeding: Prevalence of High Nutrition Risk and its Independent Prognostic Value. Nutrients 2019, 11, doi:10.3390/nu11092152.
148	Uysal, H.; Öz Alkan, H.; EnÇ, N.; YiĞit, Z. Assessment of Dietary Habits in Patients With Chronic Heart Failure. J Nurs Res 2020, 28, e65, doi:10.1097/jnr.0000000000000329.
149	Ventura Marra, M.; Drazba, M.A.; Holásková, I.; Belden, W.J. Nutrition Risk is Associated with Leukocyte Telomere Length in Middle-Aged Men and Women with at Least One Risk Factor for Cardiovascular Disease. Nutrients 2019, 11, doi:10.3390/nu11030508.
150	Viertel, M.; Bock, C.; Reich, M.; Löser, S.; Plauth, M. Performance of CT-based low skeletal muscle index, low mean muscle attenuation, and bioelectric impedance derived low phase angle in the detection of an increased risk of nutrition related mortality. Clin Nutr 2019, 38, 2375-2380, doi:10.1016/j.clnu.2018.10.018.
151	Visser, M.; Schaap, L.A.; Wijnhoven, H.A.H. Self-Reported Impact of the COVID-19 Pandemic on Nutrition and Physical Activity Behaviour in Dutch Older Adults Living Independently. Nutrients 2020, 12, doi:10.3390/nu12123708.
152	Vitman Schorr, A.; Yehuda, I.; Tamir, S. Loneliness, Malnutrition and Change in Subjective Age among Older Adults during COVID-19 Pandemic. Int J Environ Res Public Health 2020, 18, doi:10.3390/ijerph18010106.
153	Walton, K.; Haycraft, E.; Jewell, K.; Breen, A.; Randall Simpson, J.; Haines, J. The Family Mealtime Observation Study (FaMOS): Exploring the Role of Family Functioning in the Association between Mothers' and Fathers' Food Parenting Practices and Children's Nutrition Risk. Nutrients 2019, 11, doi:10.3390/nu11030630.
154	Wang, C.; Fu, G.; Ji, F.; Cheng, S.; Liu, Z.; Cao, M. Perioperative Risk Factors for Radial Forearm-Free Flap Complications. J Craniofac Surg 2020, 31, 381-384, doi:10.1097/scs.0000000000006035.
155	Wang, N.; Shi, W.; Jiao, Y. A PTPN11 mutation in a woman with Noonan syndrome and protein-losing enteropathy. BMC Gastroenterol 2020, 20, 34, doi:10.1186/s12876-020-01187-1.
156	Wang, Q.; Tang, Y.; Zhou, J.; Qin, W. A prospective study of acute kidney injury in the intensive care unit: development and validation of a risk prediction model. J Transl Med 2019, 17, 359, doi:10.1186/s12967-019-2118-6.
157	Wang, W.N.; Yang, M.F.; Wang, C.Y.; Hsu, C.Y.; Lee, B.J.; Fu, P.K. Optimal Time and Target for Evaluating Energy Delivery after Adjuvant Feeding with Small Bowel Enteral Nutrition in Critically Ill Patients at High Nutrition Risk. Nutrients 2019, 11, doi:10.3390/nu11030645.
158	Wang, Y.H.; Zhang, G.H.; Zhang, L.L.; Luo, J.L.; Gao, L. [Adrenal hemorrhage in a patient with systemic lupus erythematosus]. Beijing Da Xue Xue Bao Yi Xue Ban 2019, 51, 1178-1181, doi:10.19723/j.issn.1671-167X.2019.06.036.
159	Welderufael, A.L.; Berihu, B.A.; Berhe, Y.; Magana, T.; Asfaw, S.; Gebreselassie, K.; Belay, E.; Kebede, H.; Mulugeta, A. Nutritional status among women whose pregnancy outcome was afflicted with neural tube defects in Tigray region of Ethiopia. Brain Dev 2019, 41, 406-412, doi:10.1016/j.braindev.2018.12.005.
160	Xiao, T.; Yang, K.; Zhou, Y.; Zhang, S.; Ji, J.; Ying, C.; Shen, P.; Xiao, Y. Risk factors and outcomes in non-transplant patients with extended-spectrum beta-lactamase-producing Escherichia coli bacteremia: a retrospective study from 2013 to 2016. Antimicrob Resist Infect Control 2019, 8, 144, doi:10.1186/s13756-019-0599-y.
161	Xiao, T.; Zhu, Y.; Zhang, S.; Wang, Y.; Shen, P.; Zhou, Y.; Yu, X.; Xiao, Y. A Retrospective Analysis of Risk Factors and Outcomes of Carbapenem-Resistant Klebsiella pneumoniae Bacteremia in Nontransplant Patients. J Infect Dis 2020, 221, S174-s183, doi:10.1093/infdis/jiz559.
162	Xie, M.; Li, N.; Qiao, H.; Guo, J.F.; Li, S.L. [Acute kidney injury diagnosed by elevated serum creatinine increases mortality in ICU patients following non-cardiac surgery]. Zhonghua Yi Xue Za Zhi 2020, 100, 3285-3290, doi:10.3760/cma.j.cn112137-20200318-00824.
163	Xu, F.; Tian, Z.; Qu, Z.; Yao, L.; Zou, C.; Han, W.; Zhang, C.; Fu, C.; Wang, Y. Completely ossified thoracic intradural meningioma in an elderly patient: A case report and literature review. Medicine (Baltimore) 2020, 99, e20814, doi:10.1097/md.0000000000020814.
164	Xu, J.; Yang, Z. Risk factors and pathogenic microorganism characteristics for pneumonia in convalescent patients with stroke: A retrospective study of 380 patients from a rehabilitation hospital. J Stroke Cerebrovasc Dis 2020, 29, 104955, doi:10.1016/j.jstrokecerebrovasdis.2020.104955.
165	Xu, J.Y.; Zhu, M.W.; Zhang, H.; Li, L.; Tang, P.X.; Chen, W.; Wei, J.M. A Cross-Sectional Study of GLIM-Defined Malnutrition Based on New Validated Calf Circumference Cut-off Values and Different Screening Tools in Hospitalised Patients over 70 Years Old. J Nutr Health Aging 2020, 24, 832-838, doi:10.1007/s12603-020-1386-4.
166	Xu, X.Y.; Lu, J.L.; Xu, Q.; Hua, H.X.; Xu, L.; Chen, L. Risk factors and the utility of three different kinds of prediction models for postoperative fatigue after gastrointestinal tumor surgery. Support Care Cancer 2021, 29, 203-211, doi:10.1007/s00520-020-05483-0.
167	Yamaya, M.; Kawakami, G.; Momma, H.; Yamada, A.; Itoh, J.; Ichinose, M. Effects of Nutritional Treatment on the Frequency of Pneumonia in Bedridden Patients Receiving Oral Care. Intern Med 2020, 59, 181-192, doi:10.2169/internalmedicine.2966-19.
168	Yan, D.; Huang, Y.D.; Chen, Y.B.; Lv, T.; Gu, S.L.; Li, Y.T.; Huang, J.R.; Li, L.J. Risk factors for Clostridium difficile infection in cirrhotic patients. Hepatobiliary Pancreat Dis Int 2019, 18, 237-241, doi:10.1016/j.hbpd.2019.04.003.
169	Yan, Y.; Li, W.; Song, Y.; Yin, P.; He, Z.; Gong, Y.; Peng, L. Semiclosure wound therapy plus negative pressure wound therapy for an older patient with grade 4 diabetic foot with concomitant vascular occlusion: A case report. Medicine (Baltimore) 2019, 98, e17786, doi:10.1097/md.0000000000017786.
170	Yao, S.; Zheng, P.; Ji, L.; Ma, Z.; Wang, L.; Qiao, L.; Wan, Y.; Sun, N.; Luo, Y.; Yang, J., et al. The effect of comprehensive assessment and multi-disciplinary management for the geriatric and frail patient: A multi-center, randomized, parallel controlled trial. Medicine (Baltimore) 2020, 99, e22873, doi:10.1097/md.0000000000022873.
171	Yin, L.; Feng, S.; Shi, Z. Perioperative Nursing of Patients with Reoperation of Recurrent Parathyroid Carcinoma Invading the Upper Digestive or Respiratory Tract. Biomed Res Int 2020, 2020, 6946048, doi:10.1155/2020/6946048.
172	Yin, X.; Ge, H.; Miao, R. A case report of ocular tuberculosis in a patient with membranous nephropathy. Medicine (Baltimore) 2019, 98, e13892, doi:10.1097/md.0000000000013892.
173	Yoshioka, K.; Kishibuchi, M.; Takada, K. Protein losing gastroenteropathy due to Helicobacter pylori infection without giant rugal folds, erosion or polyposis. BMJ Case Rep 2019, 12, doi:10.1136/bcr-2019-230870.
174	Yuan, Z.; Zhou, B.; Meng, S.; Jiang, J.; Huang, S.; Lu, X.; Wu, N.; Xie, Z.; Deng, J.; Chen, X., et al. Development and external-validation of a nomogram for predicting the survival of hospitalised HIV/AIDS patients based on a large study cohort in western China. Epidemiol Infect 2020, 148, e84, doi:10.1017/s0950268820000758.
175	Zhan, T.; Liu, M.; Tang, Y.; Han, Z.; Cheng, X.; Deng, J.; Chen, X.; Tian, X.; Huang, X. Retrospective analysis of clinical characteristics of 405 patients with COVID-19. J Int Med Res 2020, 48, 300060520949039, doi:10.1177/0300060520949039.
176	Zhang, J.; Cao, F.; Wu, S.K.; Xiang-Heng, L.; Li, W.; Li, G.S.; Wang, J. Clinical characteristics of 31 hemodialysis patients with 2019 novel coronavirus: a retrospective study. Ren Fail 2020, 42, 726-732, doi:10.1080/0886022x.2020.1796705.
177	Zhang, J.; Zhao, J. Clinical Characteristics and Analysis of Lung Cancer- Associated Acute Ischemic Stroke. J Stroke Cerebrovasc Dis 2020, 29, 105164, doi:10.1016/j.jstrokecerebrovasdis.2020.105164.
178	Zhang, P.; He, Z.; Yu, G.; Peng, D.; Feng, Y.; Ling, J.; Wang, Y.; Li, S.; Bian, Y. The modified NUTRIC score can be used for nutritional risk assessment as well as prognosis prediction in critically ill COVID-19 patients. Clin Nutr 2021, 40, 534-541, doi:10.1016/j.clnu.2020.05.051.
179	Zhang, X.; Zhao, D.; Chen, Z.; Sun, Y. Protein-losing enteropathy as a complication of spontaneous isolated superior mesenteric artery dissection: A case report. Medicine (Baltimore) 2020, 99, e20580, doi:10.1097/md.0000000000020580.
180	Zhang, X.F.; Chen, J.; Wang, P.G.; Luo, S.M.; Liu, N.X.; Li, X.M.; He, X.L.; Wang, Y.; Bi, X.G.; Zhang, P., et al. [Surgical site infection after abdominal surgery in China: a multicenter cross-sectional study]. Zhonghua Wei Chang Wai Ke Za Zhi 2020, 23, 1036-1042, doi:10.3760/cma.j.cn.441530-20200810-00470.
181	Zhang, Y.; Fu, S.; Wang, J.; Zhao, X.; Zeng, Q.; Li, X. Association between Geriatric Nutrition Risk Index and low muscle mass in Chinese elderly people. Eur J Clin Nutr 2019, 73, 917-923, doi:10.1038/s41430-018-0330-8.
182	Zhang, Y.; Wang, T.; Jia, J.; Cao, W.; Ye, L.; Wang, Y.; Zhou, B.; Zhou, R. Association between RUNX3 gene polymorphisms in severe preeclampsia and its clinical features. Medicine (Baltimore) 2019, 98, e14954, doi:10.1097/md.0000000000014954.
183	Zhao, Y.; Ge, N.; Xie, D.; Gao, L.; Wang, Y.; Liao, Y.; Yue, J. The geriatric nutrition risk index versus the mini-nutritional assessment short form in predicting postoperative delirium and hospital length of stay among older non-cardiac surgical patients: a prospective cohort study. BMC Geriatr 2020, 20, 107, doi:10.1186/s12877-020-1501-8.
184	Zhou, J.; Bai, Y.; Wang, X.; Yang, J.; Fu, P.; Cai, D.; Yang, L. A simple risk score for prediction of sepsis associated-acute kidney injury in critically ill patients. J Nephrol 2019, 32, 947-956, doi:10.1007/s40620-019-00625-y.
185	Zhou, Y.L.; Li, F.; Zhang, R.Y.; Chen, Z.W.; Zhong, N.; Tang, W.P. [Clinical Characteristics and Prognostic Analysis of 59 Adult Patients with Epstein-Barr Virus-Associated Hemophagocytic Syndrome]. Zhongguo Shi Yan Xue Ye Xue Za Zhi 2020, 28, 657-662, doi:10.19746/j.cnki.issn.1009-2137.2020.02.050.
186	Zhu, C.; Liu, Y.; Kang, W.; Zhang, Z.; Zeng, Z.; Liu, D. Exploration of the role of serum ghrelin in the diagnosis and treatment of digestive tract malignancies. J Int Med Res 2020, 48, 300060520920441, doi:10.1177/0300060520920441.
187	Zhu, M.W.; Yang, X.; Xiu, D.R.; Yang, Y.; Li, G.X.; Hu, W.G.; Wang, Z.G.; Cui, H.Y.; Wei, J.M. Effect of oral nutritional supplementation on the post-discharge nutritional status and quality of life of gastrointestinal cancer patients after surgery: a multi-center study. Asia Pac J Clin Nutr 2019, 28, 450-456, doi:10.6133/apjcn.201909_28(3).0004.
188	Zubiaga Toro, L.; Ruiz-Tovar, J.; Castro, M.J.; Ortiz de Solórzano, F.J.; Luque de León, E.; Jiménez, J.M.; Carbajo, M. Whipple disease after bariatric surgery: from malabsorption to malnutrition status. Nutr Hosp 2019, 36, 238-241, doi:10.20960/nh.02258.

## Sheet: Studies obtained by handsearch 
1	Zhao, X.; Li, Y.; Ge, Y.; Shi, Y.; Lv, P.; Zhang, J.; Fu, G.; Zhou, Y.; Jiang, K.; Lin, N., et al. Evaluation of Nutrition Risk and Its Association With Mortality Risk in Severely and Critically Ill COVID-19 Patients. Journal of Parenteral and Enteral Nutrition 2020, 45, 32-42, doi:https://doi.org/10.1002/jpen.1953
2	Li, T.; Zhang, Y.; Gong, C.; Wang, J.; Liu, B.; Shi, L.; Duan, J. Prevalence of malnutrition and analysis of related factors in elderly patients with COVID-19 in Wuhan, China. Eur J Clin Nutr 2020, 74, 871-875, doi:10.1038/s41430-020-0642-3.
3	Wei, C.; Liu, Y.; Li, Y.; Zhang, Y.; Zhong, M.; Meng, X. Evaluation of the nutritional status in patients with COVID-19. J Clin Biochem Nutr 2020, 67, 116-121, doi:10.3164/jcbn.20-91.
4	Zhou, J.; Ma, Y.; Liu, Y.; Xiang, Y.; Tao, C.; Yu, H.; Huang, J. A Correlation Analysis Between the Nutritional Status and Prognosis of COVID-19 Patients. J Nutr Health Aging 2020, doi:10.1007/s12603-020-1457-6.
5	Song, F.; Ma, H.; Wang, S.; Qin, T.; Xu, Q.; Yuan, H.; Li, F.; Wang, Z.; Liao, Y.; Tan, X., et al. Nutritional screening based on objective indices at admission predicts in-hospital mortality in patients with COVID-19. Research Square 2020, doi:https://doi.org/10.21203/rs.3.rs-108125/v1.
6	Du, X.; Liu, Y.; Chen, J.; Peng, L.; Jin, Y.; Cheng, Z.; Wang, H.H.X.; Luo, M.; Chen, L.; Zhao, Y. Comparison of the Clinical Implications among Two Different Nutritional Indices in Hospitalized Patients with COVID-19. medRxiv 2020, doi:https://doi.org/10.1101/2020.04.28.20082644.
7	Wang, R.; He, M.; Yue, J.; Bai, L.; Liu, D.; Huang, Z.; Zhu, T.; Kang, Y. CONUT score is associated with mortality in patients with COVID-19: a retrospective study in Wuhan. Research Square 2020, doi:https://doi.org/10.21203/rs.3.rs-32889/v1.
8	Haraj, N.E.; El Aziz, S.; Chadli, A.; Dafir, A.; Mjabber, A.; Aissaoui, O.; Barrou, L.; El Kettani El Hamidi, C.; Nsiri, A.; Al Harrar, R., et al. Nutritional status assessment in patients with Covid-19 after discharge from the intensive care unit. Clinical Nutrition ESPEN 2021, 41, 423-428, doi:https://doi.org/10.1016/j.clnesp.2020.09.214.
9	Di Filippo, L.; De Lorenzo, R.; D'Amico, M.; Sofia, V.; Roveri, L.; Mele, R.; Saibene, A.; Rovere-Querini, P.; Conte, C. COVID-19 is associated with clinically significant weight loss and risk of malnutrition, independent of hospitalisation: A post-hoc analysis of a prospective cohort study. Clinical Nutrition 2020, doi:https://doi.org/10.1016/j.clnu.2020.10.043

## Sheet: Included studies
1	Zhao, X.; Li, Y.; Ge, Y.; Shi, Y.; Lv, P.; Zhang, J.; Fu, G.; Zhou, Y.; Jiang, K.; Lin, N., et al. Evaluation of Nutrition Risk and Its Association With Mortality Risk in Severely and Critically Ill COVID-19 Patients. Journal of Parenteral and Enteral Nutrition 2020, 45, 32-42, doi:https://doi.org/10.1002/jpen.1953
2	Li, T.; Zhang, Y.; Gong, C.; Wang, J.; Liu, B.; Shi, L.; Duan, J. Prevalence of malnutrition and analysis of related factors in elderly patients with COVID-19 in Wuhan, China. Eur J Clin Nutr 2020, 74, 871-875, doi:10.1038/s41430-020-0642-3.
3	Wei, C.; Liu, Y.; Li, Y.; Zhang, Y.; Zhong, M.; Meng, X. Evaluation of the nutritional status in patients with COVID-19. J Clin Biochem Nutr 2020, 67, 116-121, doi:10.3164/jcbn.20-91.
4	Zhou, J.; Ma, Y.; Liu, Y.; Xiang, Y.; Tao, C.; Yu, H.; Huang, J. A Correlation Analysis Between the Nutritional Status and Prognosis of COVID-19 Patients. J Nutr Health Aging 2020, doi:10.1007/s12603-020-1457-6.
5	Song, F.; Ma, H.; Wang, S.; Qin, T.; Xu, Q.; Yuan, H.; Li, F.; Wang, Z.; Liao, Y.; Tan, X., et al. Nutritional screening based on objective indices at admission predicts in-hospital mortality in patients with COVID-19. Research Square 2020, doi:https://doi.org/10.21203/rs.3.rs-108125/v1.
6	Du, X.; Liu, Y.; Chen, J.; Peng, L.; Jin, Y.; Cheng, Z.; Wang, H.H.X.; Luo, M.; Chen, L.; Zhao, Y. Comparison of the Clinical Implications among Two Different Nutritional Indices in Hospitalized Patients with COVID-19. medRxiv 2020, doi:https://doi.org/10.1101/2020.04.28.20082644.
7	Wang, R.; He, M.; Yue, J.; Bai, L.; Liu, D.; Huang, Z.; Zhu, T.; Kang, Y. CONUT score is associated with mortality in patients with COVID-19: a retrospective study in Wuhan. Research Square 2020, doi:https://doi.org/10.21203/rs.3.rs-32889/v1.
8	Haraj, N.E.; El Aziz, S.; Chadli, A.; Dafir, A.; Mjabber, A.; Aissaoui, O.; Barrou, L.; El Kettani El Hamidi, C.; Nsiri, A.; Al Harrar, R., et al. Nutritional status assessment in patients with Covid-19 after discharge from the intensive care unit. Clinical Nutrition ESPEN 2021, 41, 423-428, doi:https://doi.org/10.1016/j.clnesp.2020.09.214.
9	Di Filippo, L.; De Lorenzo, R.; D'Amico, M.; Sofia, V.; Roveri, L.; Mele, R.; Saibene, A.; Rovere-Querini, P.; Conte, C. COVID-19 is associated with clinically significant weight loss and risk of malnutrition, independent of hospitalisation: A post-hoc analysis of a prospective cohort study. Clinical Nutrition 2020, doi:https://doi.org/10.1016/j.clnu.2020.10.043
10
11
12
13
14

## Sheet: Excluded studies
Not in English	1	Motta, J.C.; Novoa, D.J.; Gómez, C.C.; Moreno, J.M.; Vargas, L.; Pérez, J.; Millán, H.; Arango Á, I. Prognostic factors in hospitalized patients diagnosed with SARS-CoV-2 infection, Bogotá, Colombia. Biomedica 2020, 40, 116-130, doi:10.7705/biomedica.5764.
